# Supplementary material for: Prostate Cancer Histopathology Using Label-free Multispectral Deep-UV Microscopy Quantifies Phenotypes of Tumor Aggressiveness and Enables Multiple Diagnostic Virtual Stains
Source: Research Square preprint supplement (doi:10.21203/rs.3.rs-1022155/v1), 2021-11-10
Supplement: Supplementary file [file dfec5c50ff98978b7180fa90.pdf]

## **Supplementary Materials for**

# **Prostate cancer histopathology using label-free multispectral deep-UV microscopy quantifies phenotypes of tumor aggressiveness and enables multiple diagnostic virtual stains**

Soheil Soltani, Ashkan Ojaghi, Hui Qiao, Nischita Kaza, Xinyang Li, Qionghai Dai, Adeboye O Osunkoya, Francisco E Robles\*

\*Corresponding author Email: [robles@gatech.edu](mailto:robles@gatech.edu)

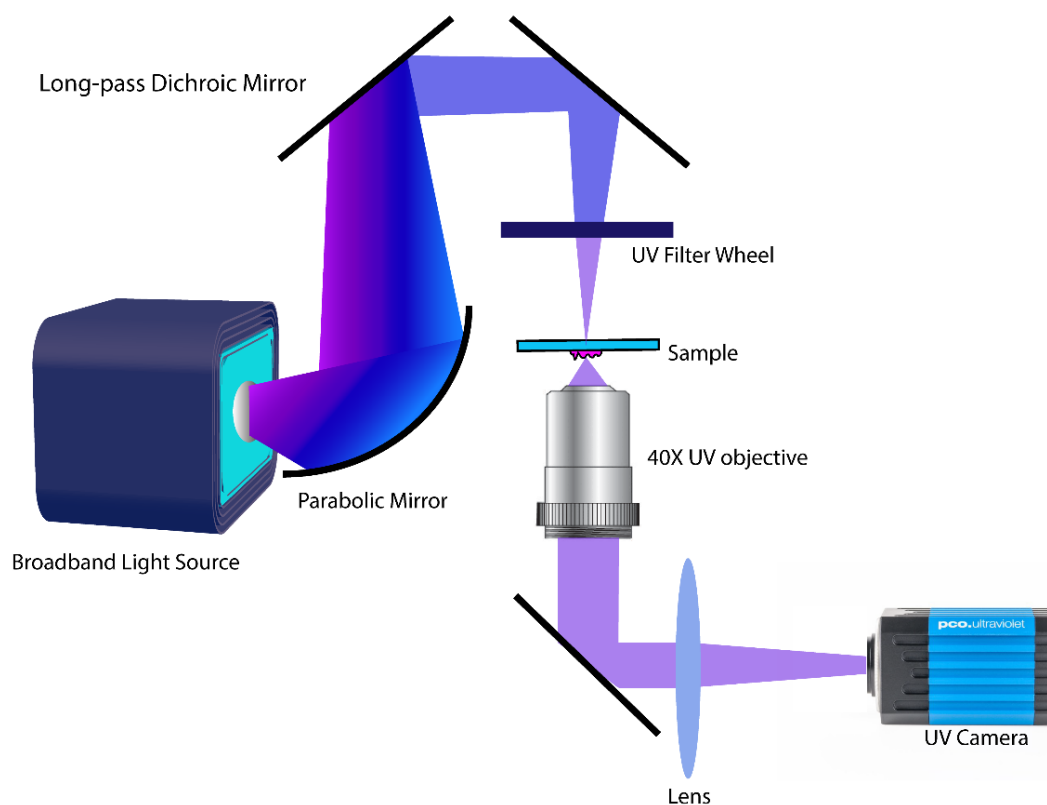

**Fig. S1. A schematic of the multi-spectral deep UV microscope.** The source provides a broadband output beam (~200 nm to 2000 nm) that is focused on the sample using a parabolic mirror. A dichroic mirror is used to only select deep UV region of the spectrum (200-550 nm). The transmitted light is collected using a 40X UV objective and is relayed on the camera using a biconvex lens

H&amp;E

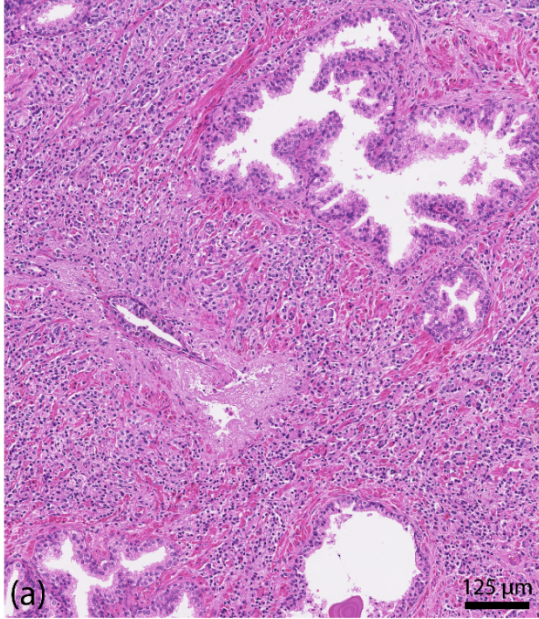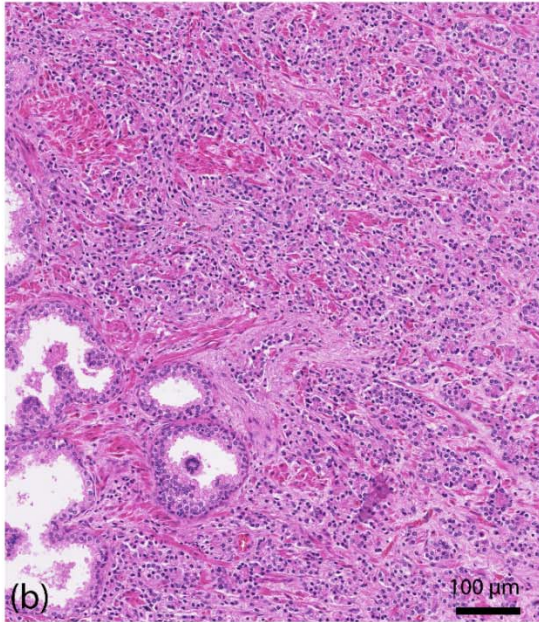

UV

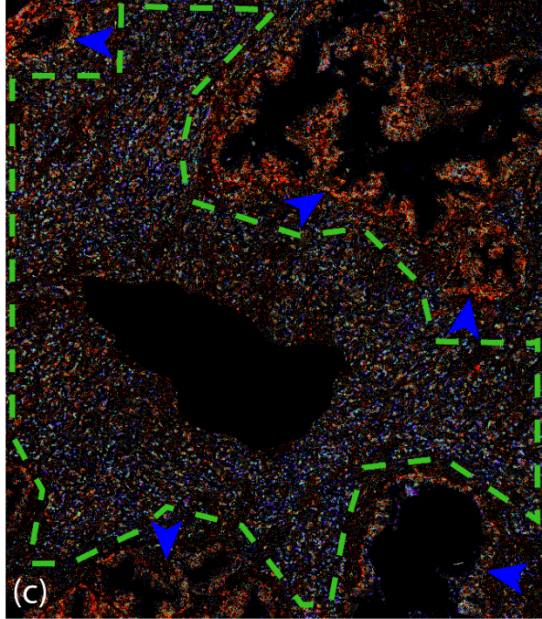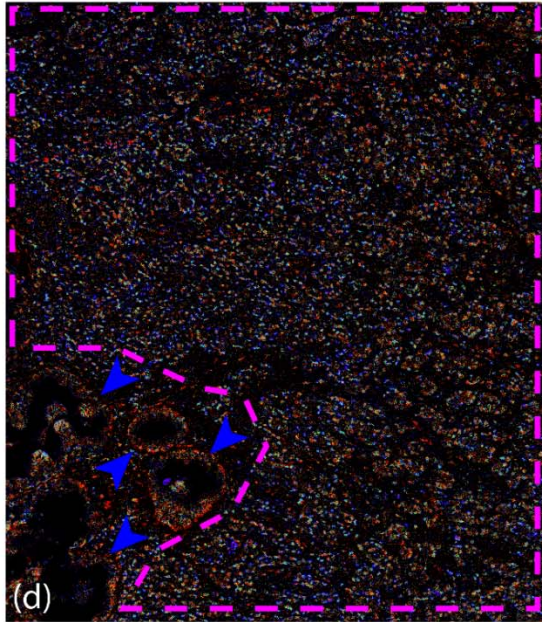

Benign  Gleason Grade 4 and 5 mix  Gleason Grade 5 

**Fig. S2. Two examples of prostate cancer regions with aggressive forms of cancer (Gleason Grade 5).** It is important to mention that the region in (b) starts from foci of Gleason Grade 4 in the right side of the image and gradually cancer regions with Gleason Grade 5 appear in the top left side of the region (there are not pure Gleason Grade 4 or Gleason Grade 5 regions). Some levels of inflammation are also present.

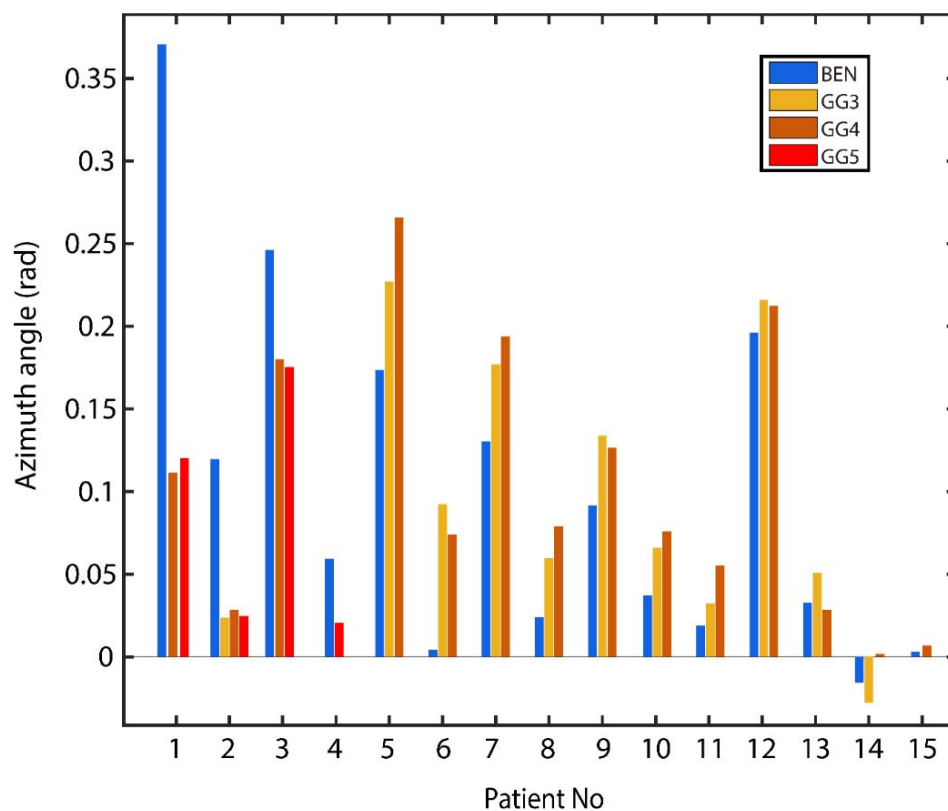

**Fig. S3. Bar plot of the absolute azimuth angle CoM.**
